# Supplementary material for: Identification of Genes Putatively Involved in Chitin Metabolism and Insecticide Detoxification in the Rice Leaf Folder (Cnaphalocrocis medinalis) Larvae through Transcriptomic Analysis
Source: MDPI journal article supplement (doi:10.3390/ijms160921873), 2015-09-10
Supplement: s1 [file s1]

# Supplementary Information

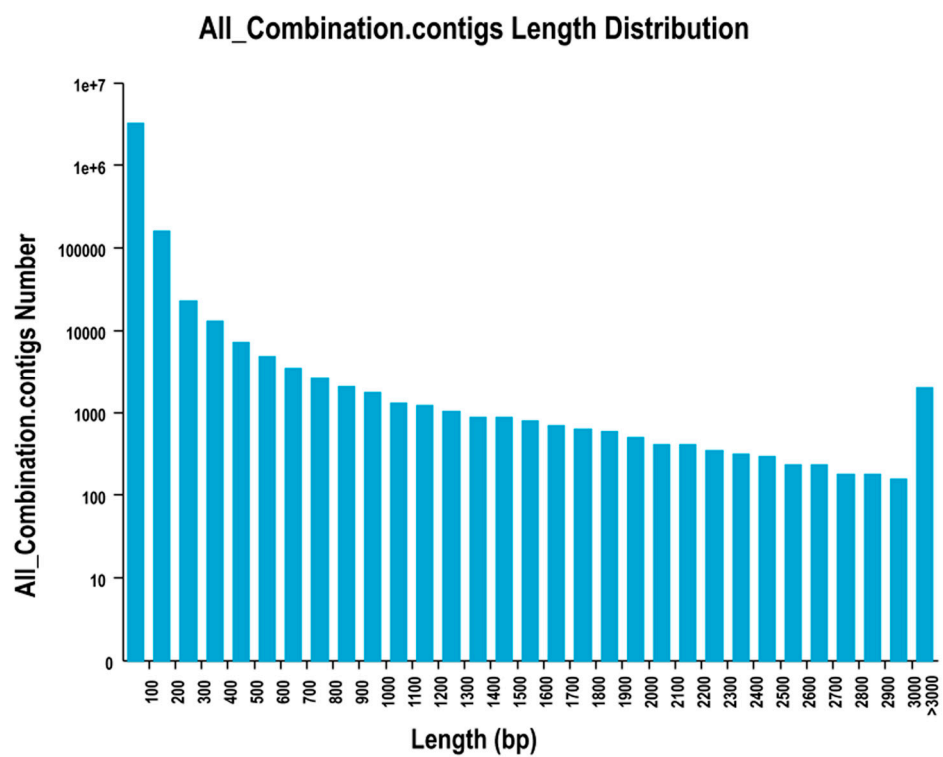

(A)

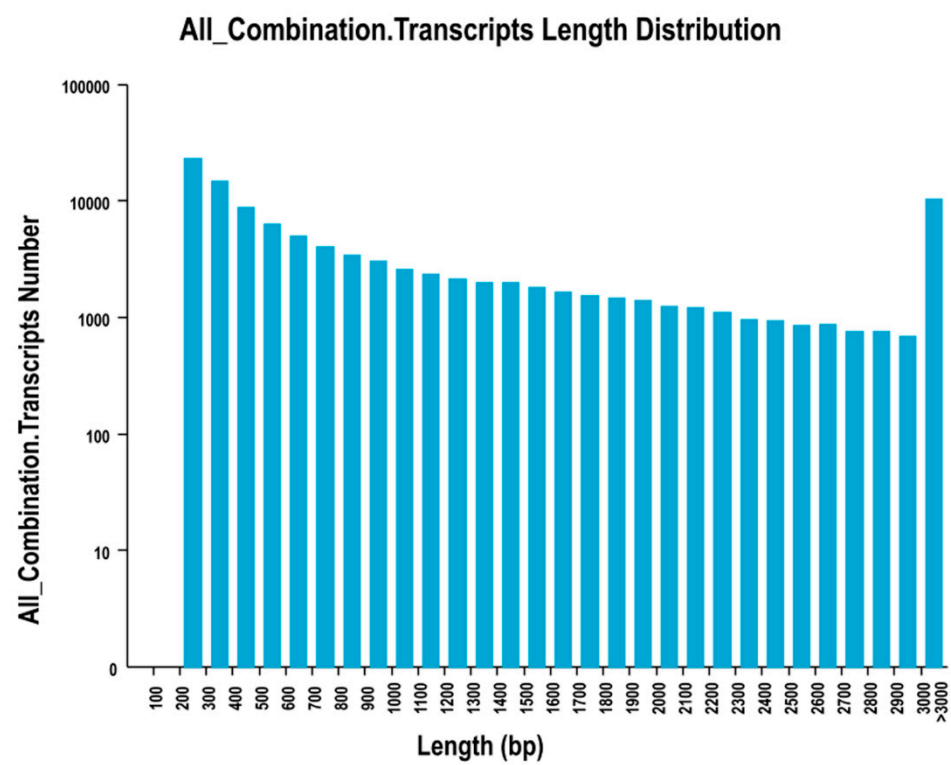

(B)

Figure S1. *Cont.*

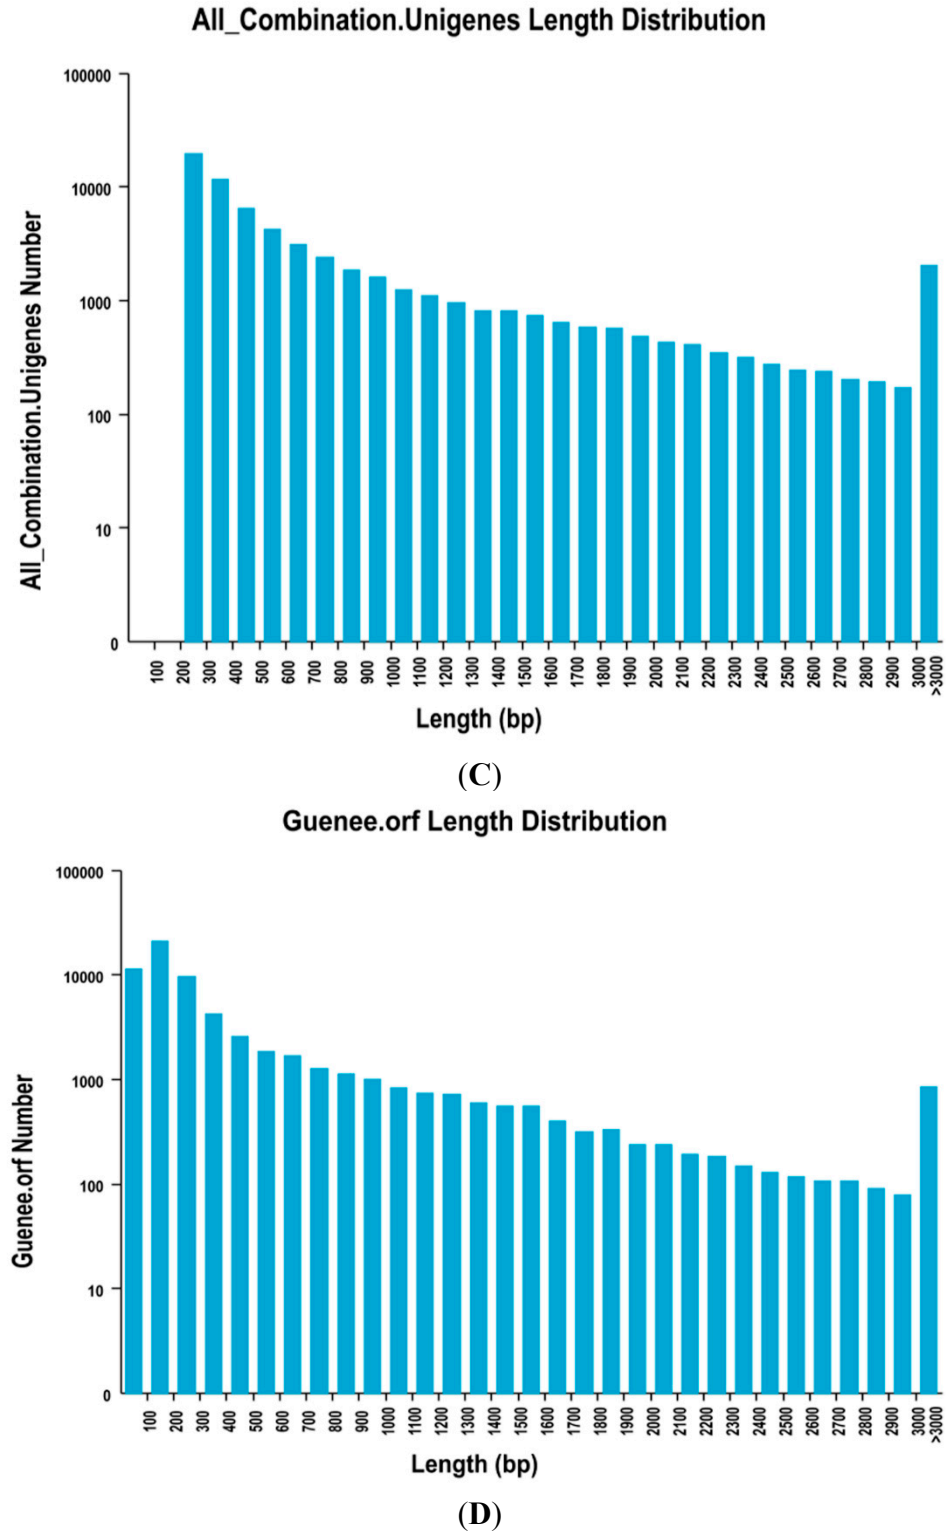

**Figure S1.** All contigs, transcripts and unigenes distribution of the *C. medinalis* transcriptome sequencing. (A) Length distribution of the contigs obtained from do novo assembly of high-quality clean reads; (B) Length distribution of the transcripts produced from further assembly of contigs; (C) Size distribution of the unigenes produced from further clustering of transcripts; (D) Length distribution of the opening reading frame (ORF). The x-axis indicates the length distribution from different range. The y-axis indicates the number of unigenes.
